# Supplementary material
Source: Royal Society of Chemistry journal article supplement (doi:10.1039/d5tc04505c)
Supplement: d5tc04505c7.pdf [file d5tc04505c7.pdf]

A novel reprogrammable magnetic continuum robot (RMCR) utilizes the phase transition of a low-melting-point alloy for real-time magnetic torque reprogramming. This dynamic optimization enables complex multi-shape deformations, precise obstacle capture, and targeted drug delivery within complex minimally invasive surgical environments.
